# Supplementary material for: Electrochemical activity of Fe-MIL-100 as a positive electrode for Na-ion batteries
Source: Royal Society of Chemistry journal article supplement (doi:10.1039/c6ta03943j), 2016-01-01
Supplement: c6ta03943j1.pdf [file c6ta03943j1.pdf]

**Supporting Information for:**

**Electrochemical activity of Fe- MIL-100 as a positive electrode for Na-ion  
batteries**

Dorina F. Sava Gallis,<sup>a</sup> Harry D. Pratt III,<sup>b</sup> Travis M. Anderson,<sup>b</sup> and Karena W. Chapman<sup>c</sup>

<sup>a</sup> Nanoscale Sciences Department, Sandia National Laboratories, Albuquerque, NM 87185, USA.

<sup>b</sup> Power Sources R&D Department, Sandia National Laboratories, Albuquerque, NM 87185, USA.

<sup>c</sup> X-ray Science Division, Advanced Photon Source, Argonne National Laboratory, Argonne, IL 60439 USA.

Fig. S1 Images of coin cell components and of assembled 2032 coin cell.

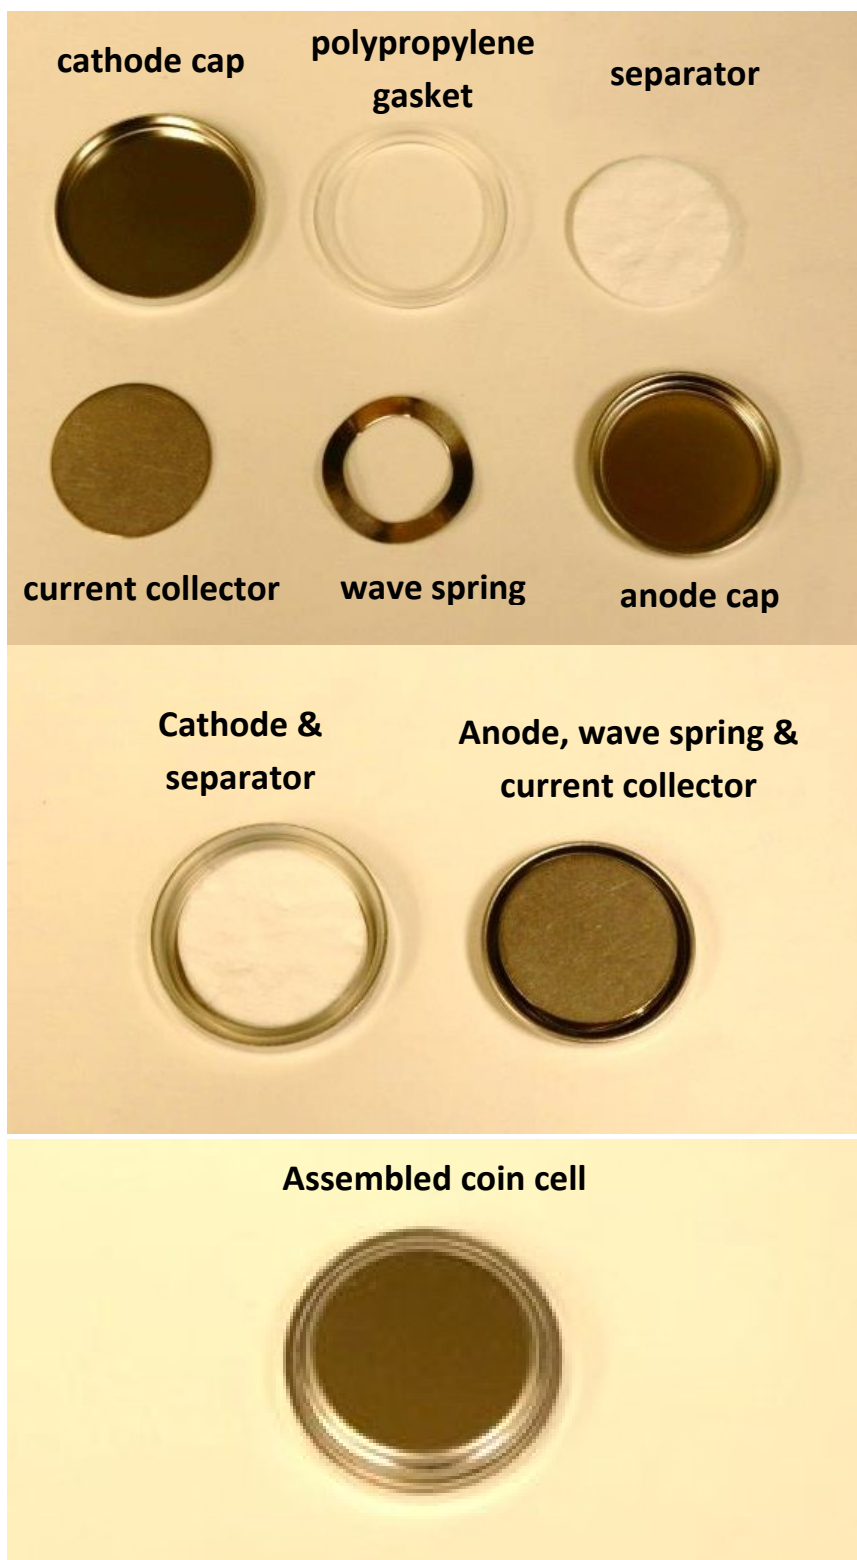

Fig. S2 Electrochemical activity of the Fe-MIL-100 cathode after the 5<sup>th</sup> cycle in 1M NaPF<sub>6</sub> in EC:PC, PC, and EC:DMC at 0.1C rate. Top: voltage profile between 4.00- 1.5 V (versus Na<sup>+</sup>/Na). Bottom: differential capacity (dQ/dV).

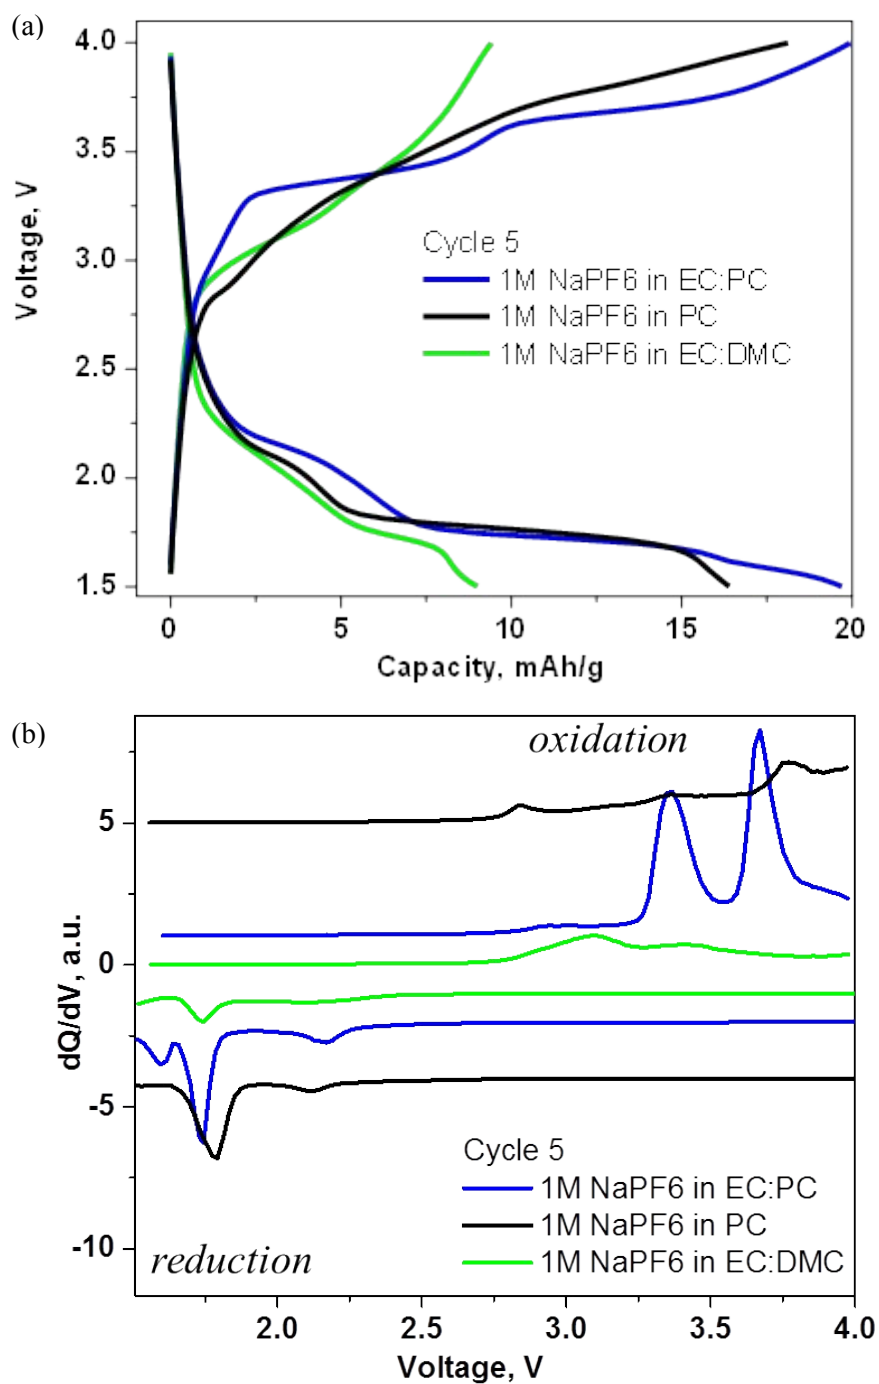

Fig. S3 Electrochemical activity of the Fe-MIL-100 cathode after the 20<sup>th</sup> cycle in 1M NaPF<sub>6</sub> in EC:PC, PC, and EC:DMC at 0.1C rate. Top: voltage profile between 4.00- 1.5 V (versus Na<sup>+</sup>/Na). Bottom: differential capacity (dQ/dV) .

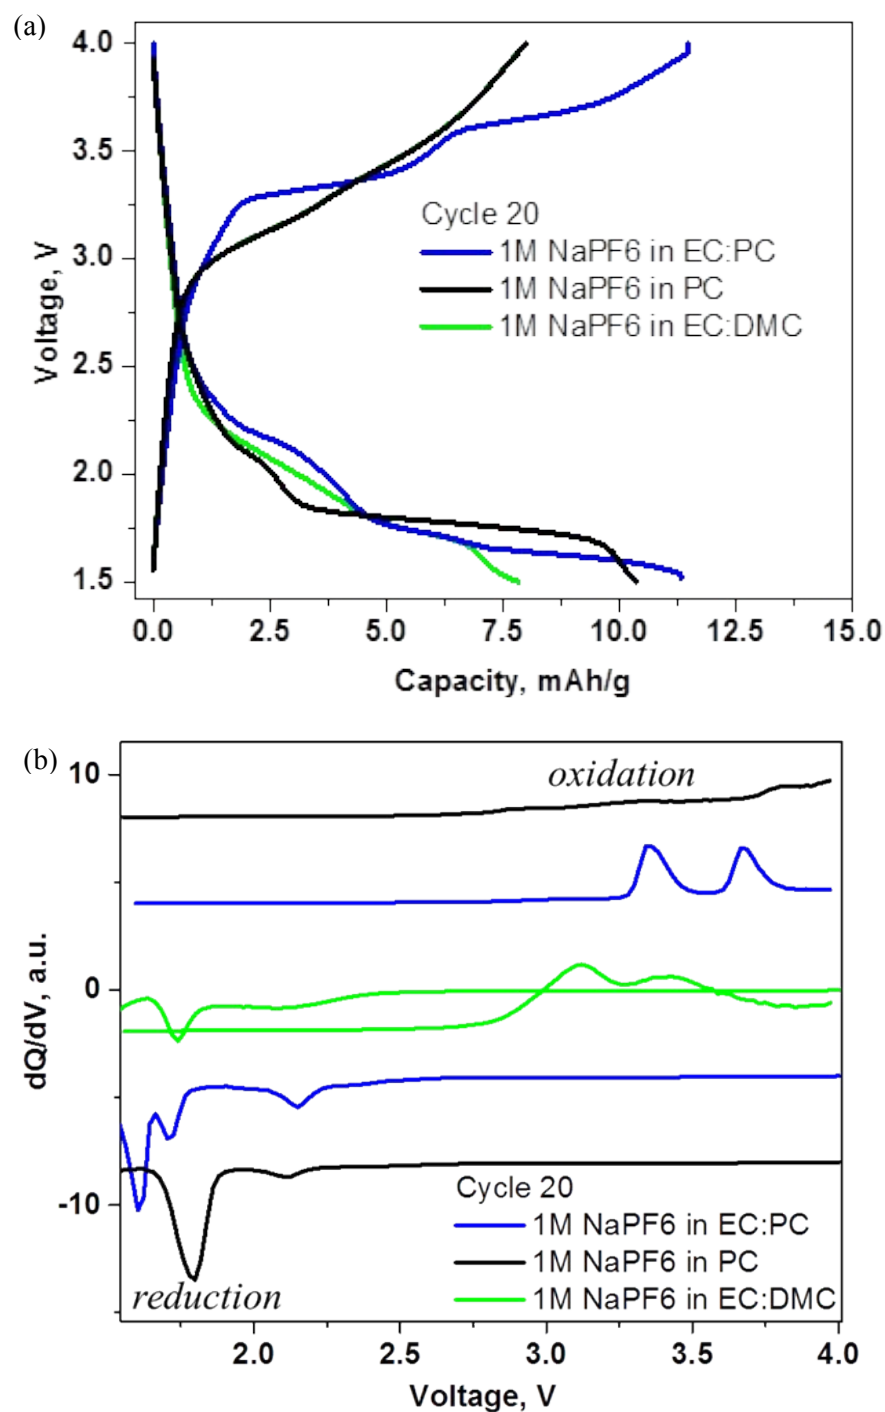

Fig.S4 Powder X-ray diffraction of as-made, cycled and washed cycled electrodes.

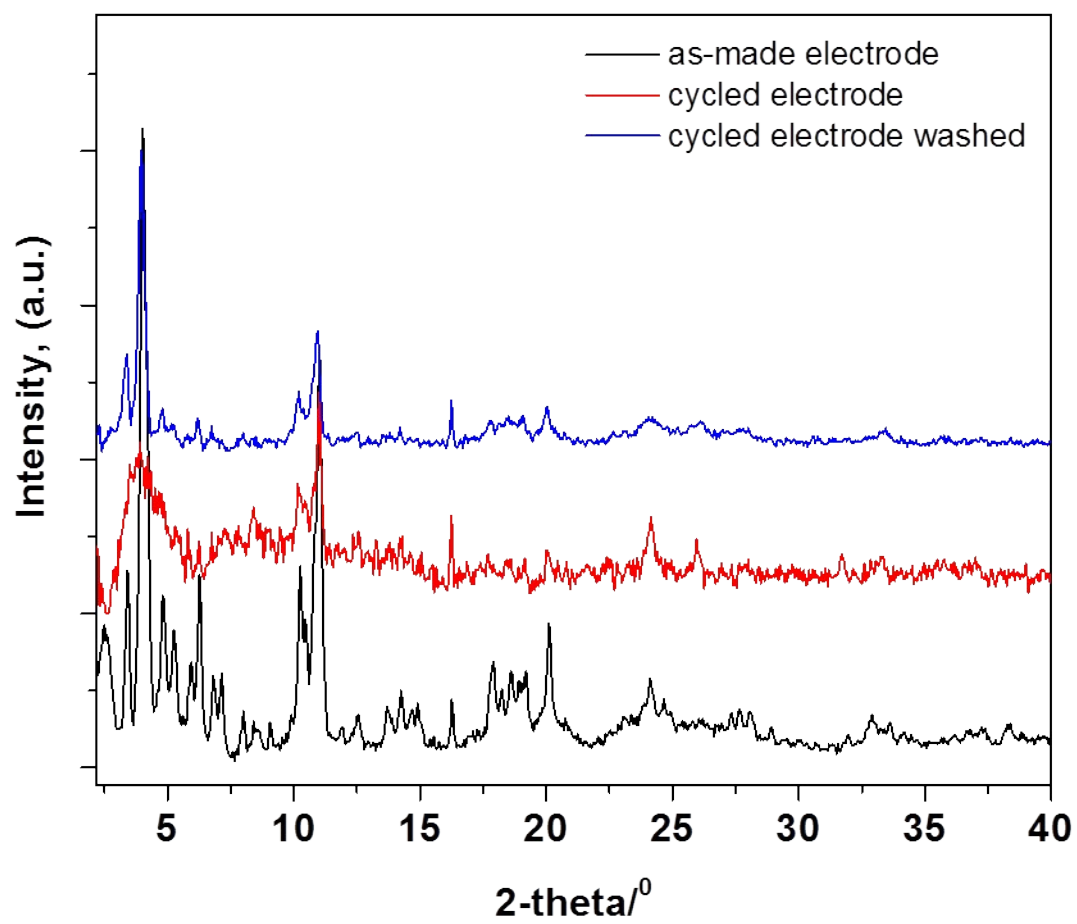

Fig.S5 PDF analysis of the as-made electrode, and electrodes after the first discharge (as cycled and after washing with DME).

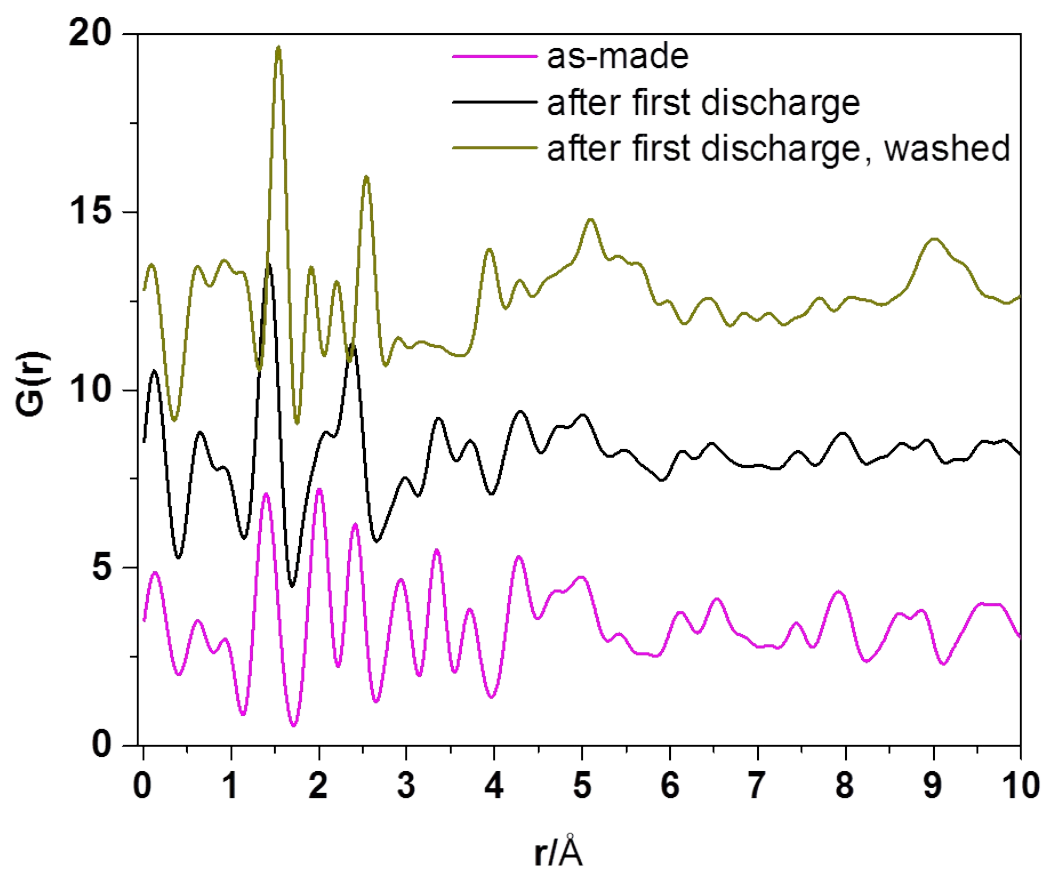

Fig.S6 Representative large area SEM and elemental mapping analysis of the cycled Fe-MIL-100 cathode, after the first discharge.

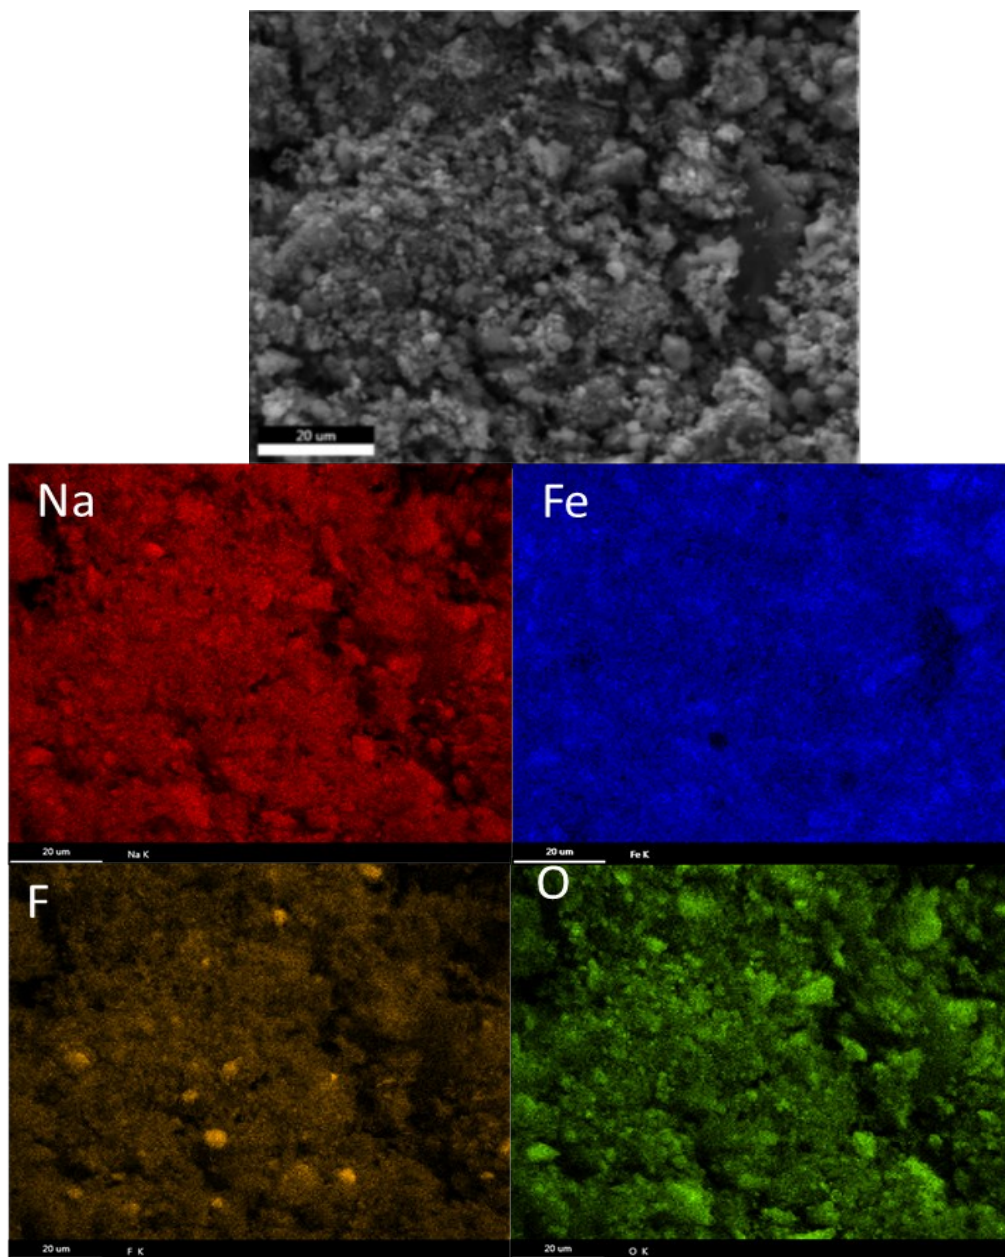

Fig.S7 SEM-EDS analysis of the cycled Fe-MIL-100 cathode after the first discharge.

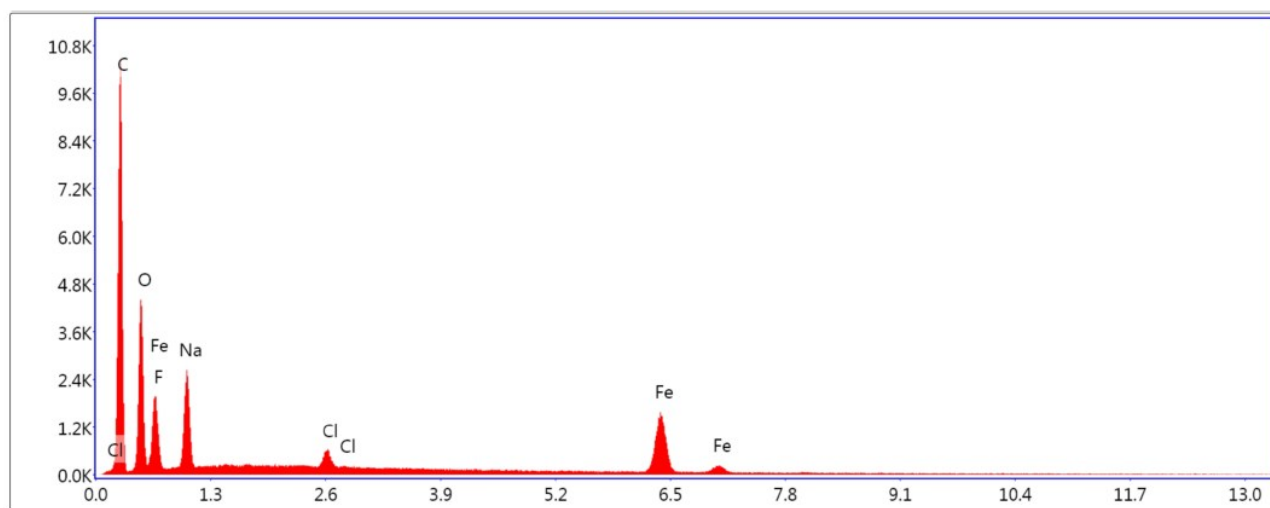

Lsec: 30.0 0 Cnts 0.000 keV Det: Octane Plus Det

### eZAF Smart Quant Results

| Element | Weight % | Atomic % | Net Int. | Error % | Kratio | Z      | R      | A      | F      |
|---------|----------|----------|----------|---------|--------|--------|--------|--------|--------|
| C K     | 55.99    | 67.28    | 1975.91  | 6.67    | 0.2719 | 1.0423 | 0.9799 | 0.4659 | 1.0000 |
| O K     | 23.91    | 21.57    | 899.53   | 9.79    | 0.0421 | 0.9967 | 0.9994 | 0.1766 | 1.0000 |
| F K     | 8.01     | 6.09     | 437.17   | 10.62   | 0.0134 | 0.9262 | 1.0079 | 0.1813 | 1.0000 |
| NaK     | 5.04     | 3.16     | 600.96   | 8.21    | 0.0165 | 0.9047 | 1.0230 | 0.3605 | 1.0015 |
| ClK     | 0.51     | 0.21     | 149.45   | 6.83    | 0.0043 | 0.8429 | 1.0575 | 0.9702 | 1.0245 |
| FeK     | 6.54     | 1.69     | 680.08   | 3.07    | 0.0554 | 0.7610 | 1.0860 | 1.0228 | 1.0883 |
